# Supplementary material for: Living polymerization of acrylamides catalysed by N-heterocyclic olefin-based Lewis pairs
Source: Royal Society of Chemistry journal article supplement (doi:10.1039/c9py00427k), 2019-01-01
Supplement: c9py00427k1.pdf [file c9py00427k1.pdf]

## Supporting Information

### **Living Polymerization of Acrylamides catalysed by *N*-Heterocyclic Olefin-Based Lewis Pairs**

*Huaiyu Wang, Qianyi Wang, Jianghua He\* and Yuetao Zhang\**

State Key Laboratory of Supramolecular Structure and Materials, College of Chemistry, Jilin University, Changchun, 130012, China.

---

\* Corresponding author. E-mails: [hjh2015@jlu.edu.cn](mailto:hjh2015@jlu.edu.cn); [ytzhang2009@jlu.edu.cn](mailto:ytzhang2009@jlu.edu.cn)

## Table of Contents

|                                                                                                    |     |
|----------------------------------------------------------------------------------------------------|-----|
| 1. Stoichiometric NMR reaction of NHO with $\text{AlPh}_3 \cdot \text{OEt}_2$ .....                | S3  |
| 2. Stoichiometric reactions of $\text{NHO}_4/\text{MeAl}(\text{BHT})_2$ with DMAA.....             | S6  |
| 3. Control experiments of DMAA polymerization.....                                                 | S6  |
| 4. DEAA polymerization by NHO based LPs.....                                                       | S7  |
| 5. Plots of $M_n$ and $\bar{D}$ for PDMAA vs $[\text{DMAA}]_0/[\text{NHO}_4]_0/\text{ratio}$ ..... | S7  |
| 6. MALDI-TOF MS spectra of low-MW PDMAA by $\text{NHO}_4/\text{Al}(\text{C}_6\text{F}_5)_3$ .....  | S8  |
| 7. MALDI-TOF MS spectra of low-MW PDMAA by $\text{NHO}_4/\text{AlMe}_3$ .....                      | S9  |
| 8. Chain extension experiments for DMAA Polymerization.....                                        | S10 |
| 9. Random and block copolymerization .....                                                         | S11 |

## 1. Stoichiometric NMR reaction of NHO with $\text{AlPh}_3 \cdot \text{OEt}_2$

**General procedure for NMR reaction of NHO with  $\text{AlPh}_3 \cdot \text{OEt}_2$ :** A Teflon-valve-sealed J. Young-type NMR tube was charged with NHO (0.02 mmol) and 0.3 mL of  $\text{C}_6\text{D}_6$ . A solution of  $\text{AlPh}_3 \cdot \text{OEt}_2$  (6.6 mg, 0.02 mmol, 0.3 mL  $\text{C}_6\text{D}_6$ ) was added to this tube via pipette at ambient temperature, and the mixture was allowed to react for 15 min before analysis by NMR.

a) Stoichiometric NMR reaction of **NHO4** with  $\text{AlPh}_3 \cdot \text{OEt}_2$

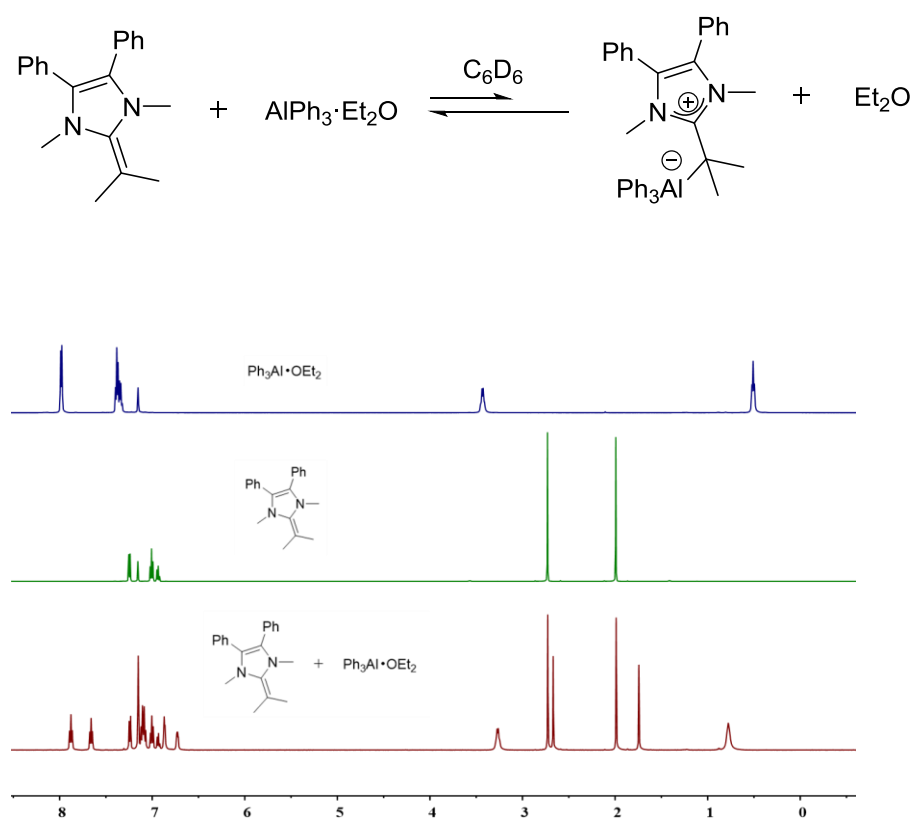

Figure S1. Overlay of  $^1\text{H}$  NMR spectra for **NHO4**,  $\text{AlPh}_3 \cdot \text{OEt}_2$  and reaction of **NHO4** with  $\text{AlPh}_3 \cdot \text{OEt}_2$  (500 MHz,  $\text{Benzene-}d_6$ )

b) Stoichiometric NMR reaction of **NHO1** with  $\text{AlPh}_3 \cdot \text{OEt}_2$

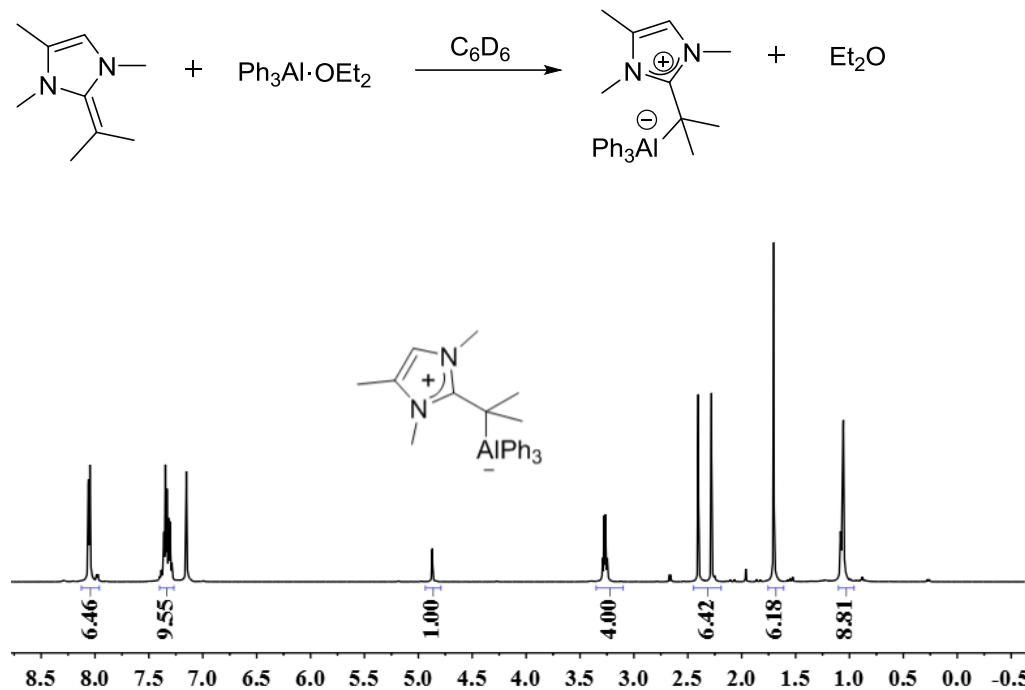

Figure S2.  $^1\text{H}$  NMR spectrum for reaction of **NHO1** with  $\text{AlPh}_3 \cdot \text{OEt}_2$  (500 MHz,  $\text{Benzene-}d_6$ )

c) Stoichiometric NMR reaction of **NHO2** with  $\text{AlPh}_3 \cdot \text{OEt}_2$

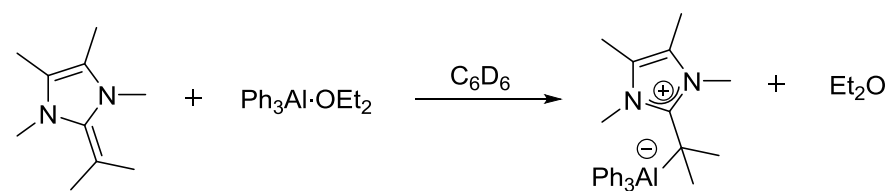

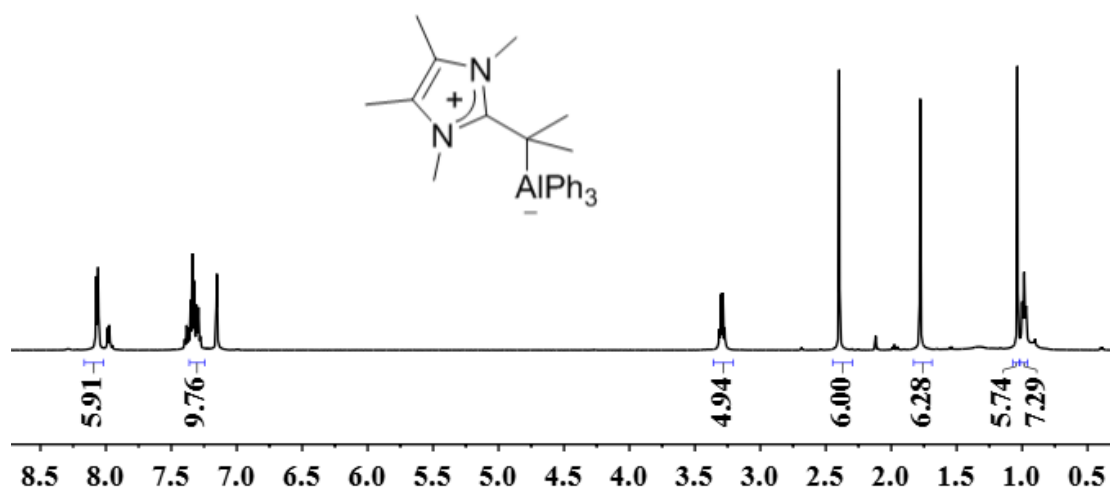

Figure S3.  $^1\text{H}$  NMR spectra for reaction of **NHO2** with  $\text{AlPh}_3 \cdot \text{OEt}_2$  (500 MHz, Benzene- $d_6$ )

d) Stoichiometric NMR reaction of **NHO3** with  $\text{AlPh}_3 \cdot \text{OEt}_2$

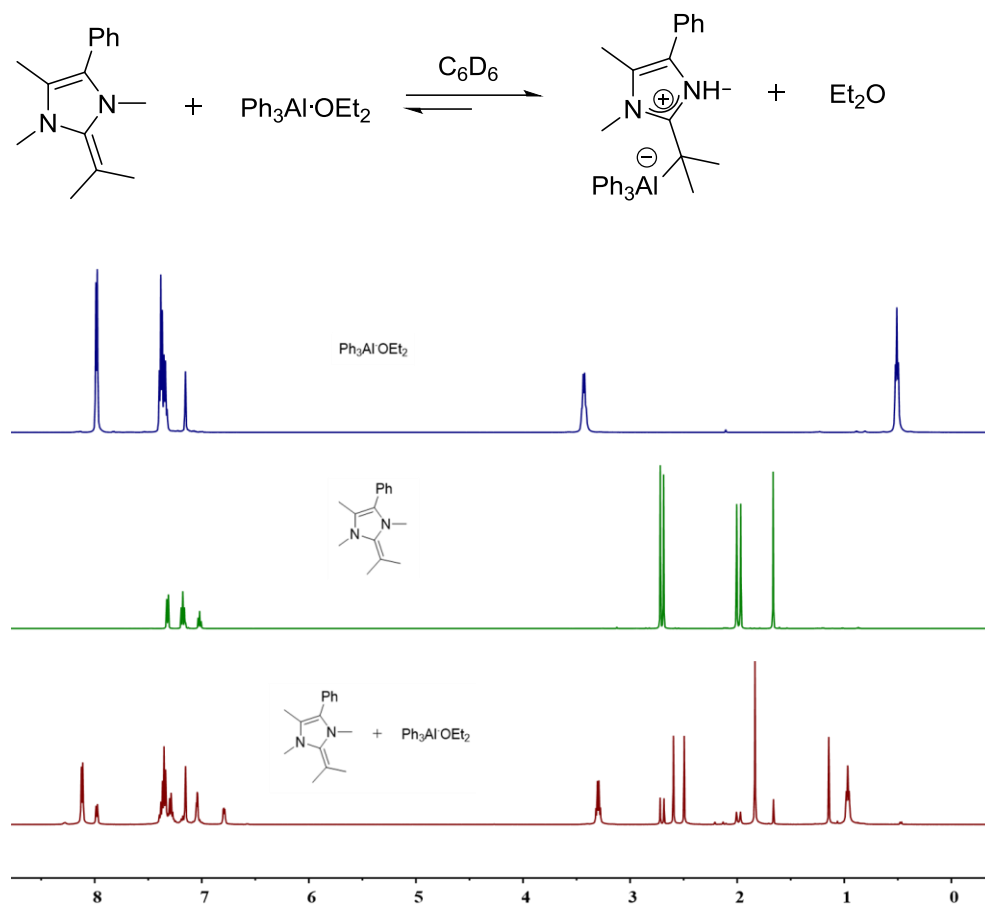

Figure S4. Overlay of  $^1\text{H}$  NMR spectra for **NHO3**,  $\text{AlPh}_3 \cdot \text{OEt}_2$  and reaction of **NHO3** with  $\text{AlPh}_3 \cdot \text{OEt}_2$  (500 MHz, Benzene- $d_6$ )

## 2. Stoichiometric reactions of **NHO4**/MeAl(BHT)<sub>2</sub> with DMAA

In an argon-filled glovebox, a Teflon-valve-sealed J. Young-type NMR tube was charged with 5.8 mg (0.02 mmol) of **NHO4** and 0.3 mL of C<sub>6</sub>D<sub>6</sub>. A 0.3 mL C<sub>6</sub>D<sub>6</sub> solution of MeAl(BHT)<sub>2</sub>·DMAA (11.6 mg, 0.02 mmol) was slowly added to this tube via pipet at room temperature. The mixture was allowed to react for 15 min at room temperature before the NMR spectra were recorded, which showed the clean formation of the zwitterion as two isomers in a 7:5 ratio.

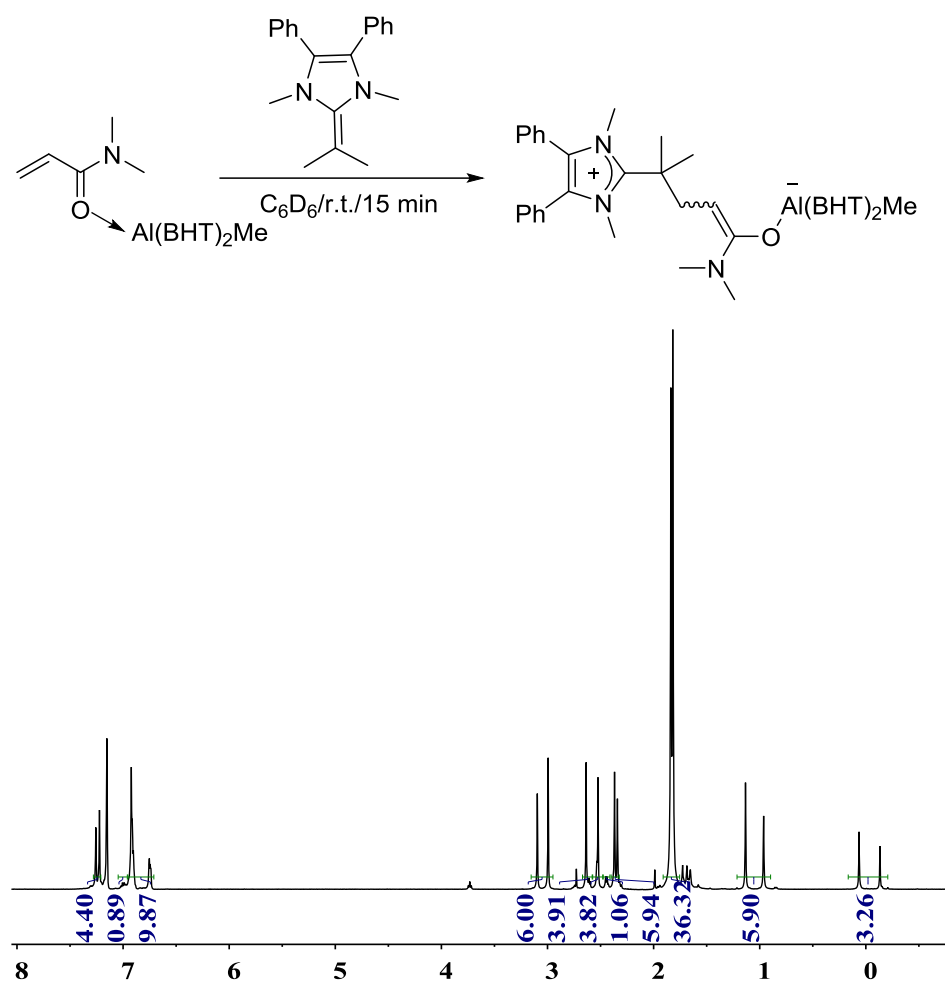

Figure S5. <sup>1</sup>H NMR spectrum obtained for the stoichiometric reaction of **NHO4**/MeAl(BHT)<sub>2</sub> with DMAA

## 3. Control experiments of DMAA polymerization

Table S1. Results of the polymerization of DMAA by LA alone<sup>a</sup>

| Entry | LA                                  | M:LA  | Time | conv.(%) <sup>b</sup> |
|-------|-------------------------------------|-------|------|-----------------------|
| 1     | <i>i</i> Bu <sub>3</sub> Al         | 800:2 | 1min | 68.0                  |
|       |                                     |       | 5min | 100                   |
| 2     | AlPh <sub>3</sub> ·OEt <sub>2</sub> | 800:2 | 30s  | 0                     |

|       |      |
|-------|------|
| 10min | 0    |
| 1h    | 90.6 |
| 5h    | 100  |

<sup>a</sup>Condition: carried out at RT in 4.5 mL of toluene; for a 800DMAA/2LA ratio, [DMAA]<sub>0</sub> = 0.94 M and [LA]<sub>0</sub> = 2.34 mM. <sup>b</sup>Monomer conversions measured by <sup>1</sup>H NMR.

#### 4. DEAA polymerization by NHO based LPs

Table S2. Results of the polymerization of DEAA by NHO based LPs<sup>a</sup>

| Entry | LB          | LA                                  | M:LB:LA | Time | Conv. <sup>b</sup> (%) | $M_n^c$ (kg·mol <sup>-1</sup> ) | $\bar{D}^c$ ( $M_w/M_n$ ) | $I^d$ (%) |
|-------|-------------|-------------------------------------|---------|------|------------------------|---------------------------------|---------------------------|-----------|
| 1     | <b>NHO1</b> | MeAl(BHT) <sub>2</sub>              | 800:1:2 | 10 h | 34.1                   | n.d.                            |                           |           |
| 2     | <b>NHO2</b> | MeAl(BHT) <sub>2</sub>              | 800:1:2 | 10 h | 30.4                   | n.d.                            |                           |           |
| 3     | <b>NHO3</b> | MeAl(BHT) <sub>2</sub>              | 800:1:2 | 10 h | 17.9                   | n.d.                            |                           |           |
| 4     | <b>NHO4</b> | MeAl(BHT) <sub>2</sub>              | 800:1:2 | 10 h | 21.7                   | n.d.                            |                           |           |
| 5     | <b>NHO1</b> | AlPh <sub>3</sub> ·OEt <sub>2</sub> | 800:1:2 | 30 s | 100                    | 85.1                            | 1.09                      | 119       |
| 6     | <b>NHO2</b> | AlPh <sub>3</sub> ·OEt <sub>2</sub> | 800:1:2 | 30 s | 100                    | 99.4                            | 1.10                      | 102       |
| 7     | <b>NHO3</b> | AlPh <sub>3</sub> ·OEt <sub>2</sub> | 800:1:2 | 30 s | 100                    | 87.3                            | 1.11                      | 116       |
| 8     | <b>NHO4</b> | AlPh <sub>3</sub> ·OEt <sub>2</sub> | 800:1:2 | 30 s | 100                    | 90                              | 1.12                      | 113       |

<sup>a</sup>Condition: carried out at RT in 4.5 mL of toluene; for a 800DEAA/1LB/2LA ratio, [DEAA]<sub>0</sub> = 0.94 M and [LA]<sub>0</sub> = 2[LB]<sub>0</sub> = 2.34 mM. <sup>b</sup>Monomer conversions measured by <sup>1</sup>H NMR. <sup>c</sup> $M_n$  and  $\bar{D}$  determined by GPC relative to PMMA standards in DMF. <sup>d</sup>Initiation efficiency ( $I^*$ )% =  $M_n(\text{calcd})/M_n(\text{exptl}) \times 100$ , where  $M_n(\text{calcd}) = [\text{MW}(\text{DMAA})][[\text{DMAA}]_0 / [\text{I}]_0](\text{conversion}) + \text{MW of chain end groups}$ .

#### 5. Plots of $M_n$ and $\bar{D}$ for PDMAA vs [DMAA]<sub>0</sub>/[NHO4]<sub>0</sub>/ratio

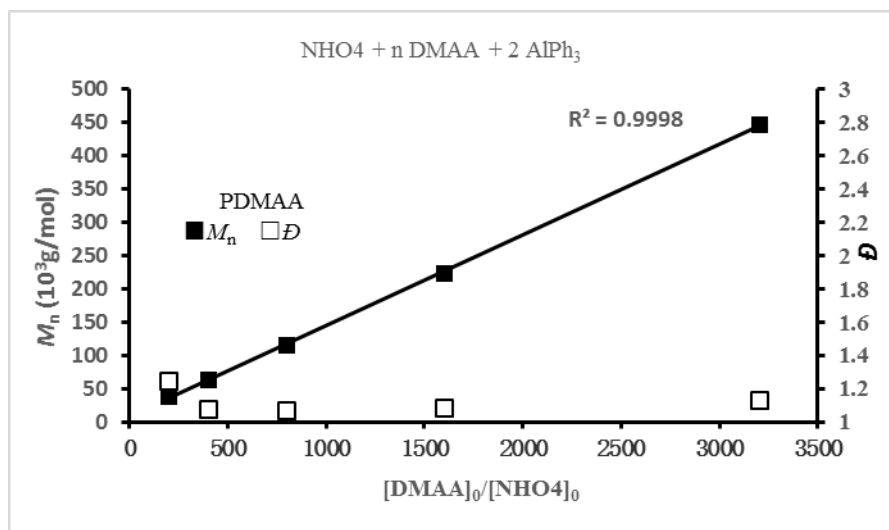

Figure S6. Plots of  $M_n$  and  $\bar{D}$  for PDMAA vs  $[\text{DMAA}]_0/[\text{NHO4}]_0$  ratio.

## 6. MALDI-TOF MS spectra of low-MW PDMAA by $\text{NHO4}/\text{Al}(\text{C}_6\text{F}_5)_3$

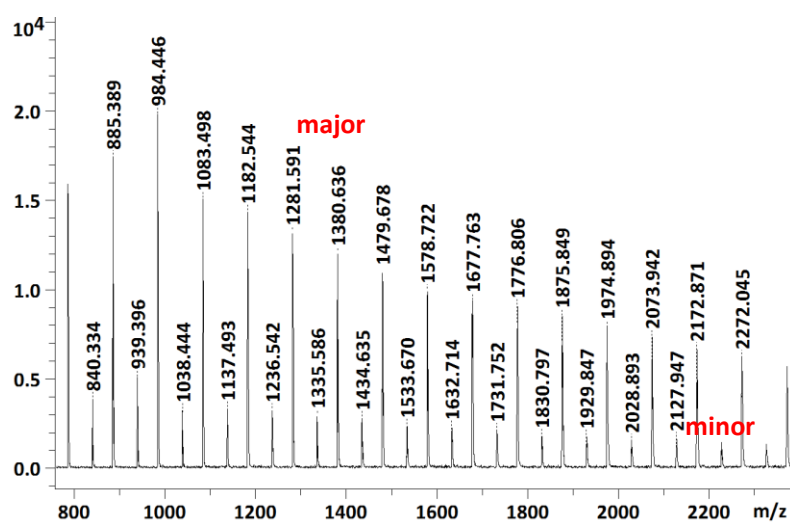

Figure S7. MALDI-TOF mass spectrum of the low-MW PDMAA sample produced by  $\text{NHO4}/\text{Al}(\text{C}_6\text{F}_5)_3$  in toluene at RT.

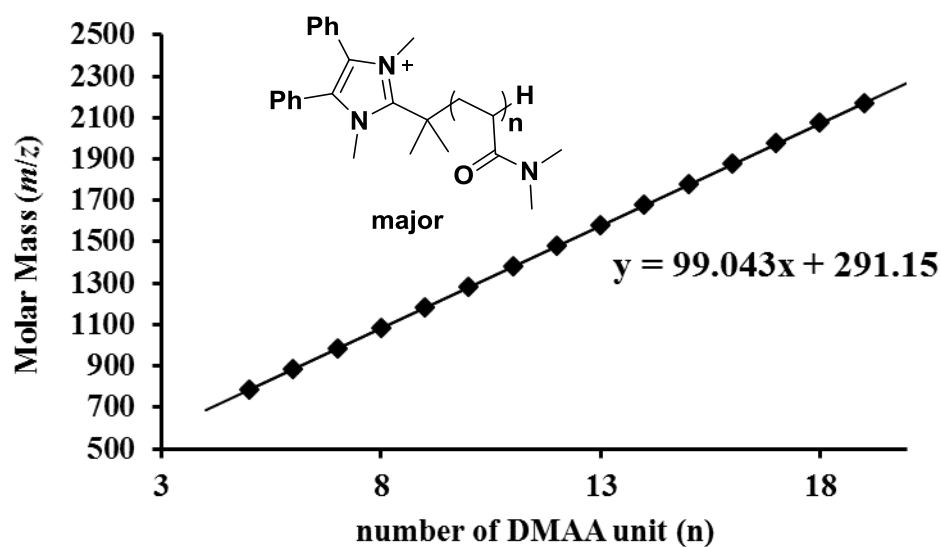

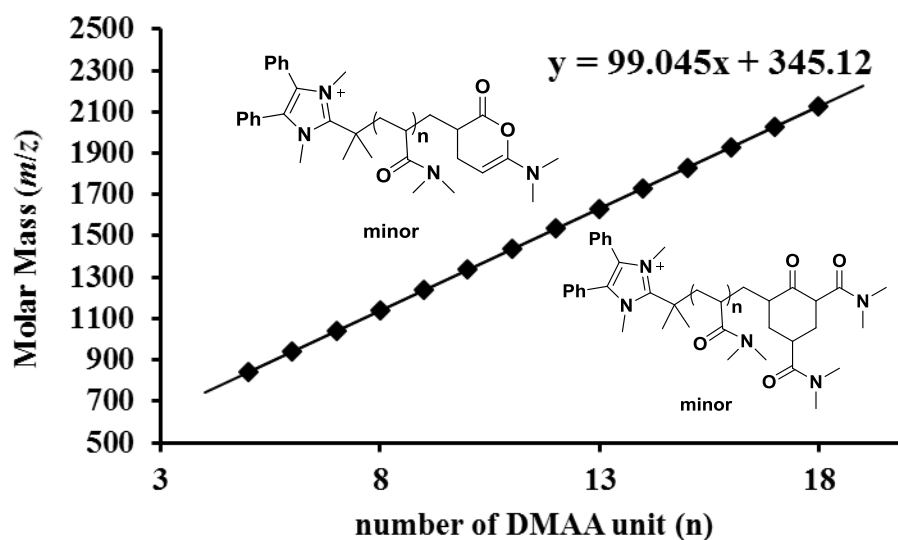

Figure S8. Plot of  $m/z$  values from Figure S7 vs the number of DMAA repeat units ( $n$ ).

#### 7. MALDI-TOF MS spectra of low-MW PDMAA by NHO4/AlMe<sub>3</sub>

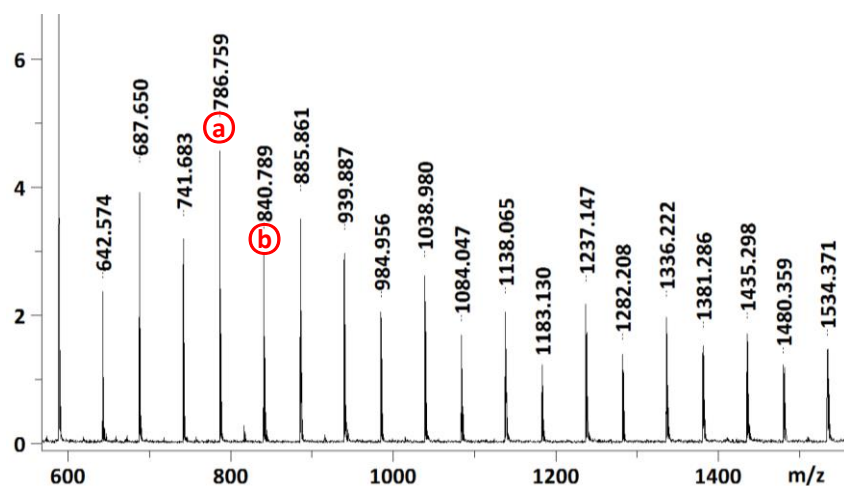

Figure S9. MALDI-TOF mass spectrum of the low-MW PDMAA sample produced by NHO4/AlMe<sub>3</sub> in toluene at RT

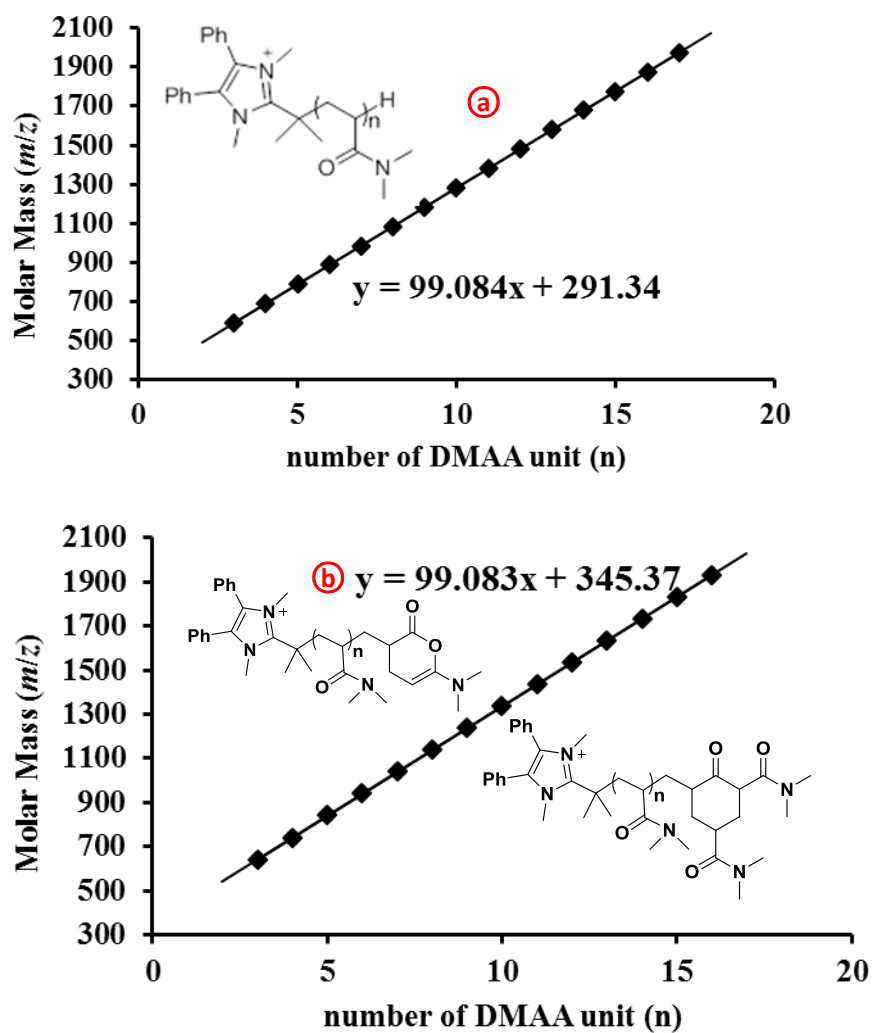

Figure S10. Plot of  $m/z$  values from Figure S9 vs the number of DMAA repeat units ( $n$ ).

## 8. Chain extension experiments for DMAA Polymerization

Table S3. Chain-extension polymerization of DMAA by **NHO4**/AlPh<sub>3</sub> system <sup>a</sup>

| Entry | M1/M2/M3        | Conv. <sup>b</sup> (%) | $M_n^c$ (kg·mol <sup>-1</sup> ) | $\bar{D}^c$ |
|-------|-----------------|------------------------|---------------------------------|-------------|
| 1     | 400DMAA         | 100                    | 63.9                            | 1.08        |
| 2     | 400/400DMAA     | 100                    | 114                             | 1.14        |
| 3     | 400/400/400DMAA | 100                    | 183                             | 1.13        |

<sup>a</sup> Condition: the first run was carried out with a 400/2/1 DMAA/AlPh<sub>3</sub>/**NHO4** ratio ([DMAA]<sub>0</sub> = 0.94 M, [AlPh<sub>3</sub>]<sub>0</sub> = 2[**NHO4**]<sub>0</sub> = 4.68 mM) in 4.50 ml toluene at room temperature. <sup>b</sup> Monomer conversions measured by <sup>1</sup>H NMR. <sup>c</sup>  $M_n$  and  $\bar{D}$  determined by GPC relative to PMMA standards in DMF.

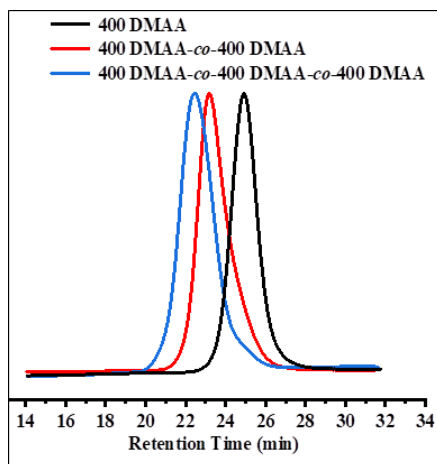

Figure S11. The GPC traces of PDMAA samples obtained from chain extension experiments in toluene at RT.

## 9. Random and block copolymerization

Table S4. Copolymerization of DMAA and DEAA by NHO4/ $\text{AlPh}_3$  system <sup>a</sup>

| Entry          | M1/M2/M3                                      | Conv. <sup>b</sup> (%) | $M_n^c$ ( $\text{kg}\cdot\text{mol}^{-1}$ ) | $\bar{D}^c$ |
|----------------|-----------------------------------------------|------------------------|---------------------------------------------|-------------|
| 1 <sup>d</sup> | 400DMAA- <i>ran</i> -400DEAA                  | DMAA:100               | 103                                         | 1.09        |
|                |                                               | DEAA: 100              |                                             |             |
| 2              | 400DMAA- <i>b</i> -400DEAA                    | DMAA:100               | 100                                         | 1.13        |
|                |                                               | DEAA: 100              |                                             |             |
| 3              | 400DMAA- <i>b</i> -400DEAA- <i>b</i> -400DMAA | DMAA:100               | 171                                         | 1.14        |
|                |                                               | DEAA: 100              |                                             |             |
| 4              | 400DEAA- <i>b</i> -400DMAA                    | DMAA:100               | 100                                         | 1.21        |
|                |                                               | DEAA: 100              |                                             |             |
| 5              | 400DEAA- <i>b</i> -400DMAA- <i>b</i> -400DEAA | DMAA:100               | 155                                         | 1.14        |
|                |                                               | DEAA: 100              |                                             |             |

<sup>a</sup> Carried out in 4.50 ml toluene at room temperature, where  $[\text{DMAA}]_0 = [\text{DEAA}]_0 = 0.94 \text{ M}$  and  $\text{AlPh}_3$  was used.

<sup>b</sup> Monomer conversions (conv.) measured by  $^1\text{H}$  NMR. <sup>c</sup>  $M_n$  and  $\bar{D}$  determined by GPC relative to PMMA standards in DMF. <sup>d</sup> DMAA and DEAA was added at the same time.

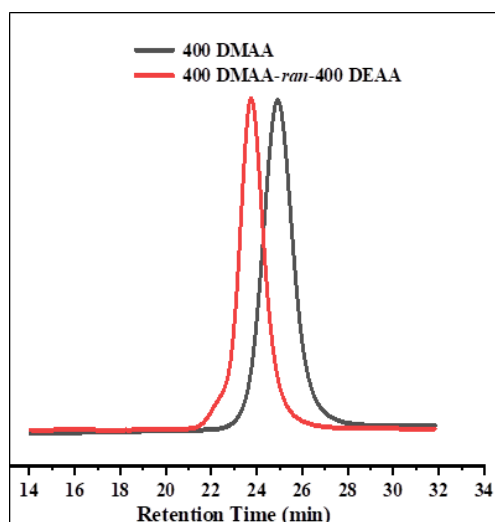

Figure S12. The GPC traces of PDMAA samples obtained from random copolymerization of DMAA and DEAA in toluene at RT.
